# Supplementary material
Source: Springer Nature journal article supplement (https://www.springermedizin.de/resource/supplementary/13075_2010_2979_MOESM4_ESM.pdf/9693484)

**A.**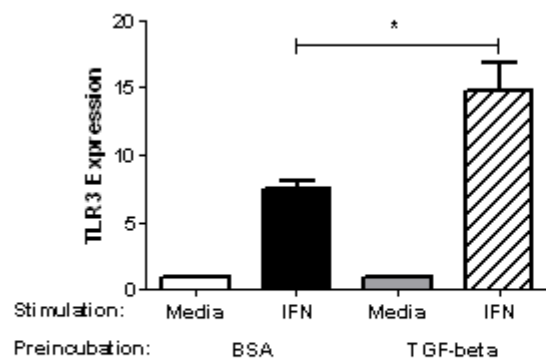**B.****Normal Fibroblasts**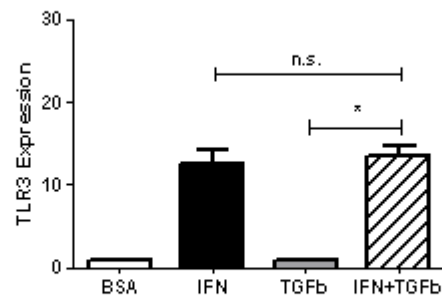**Scleroderma Fibroblasts**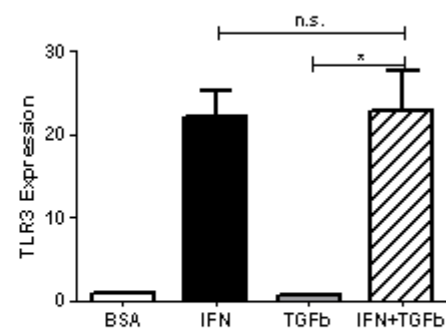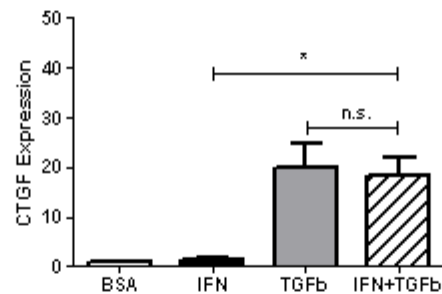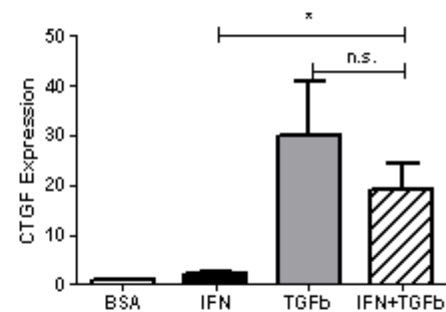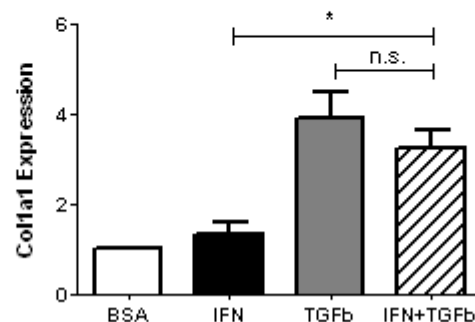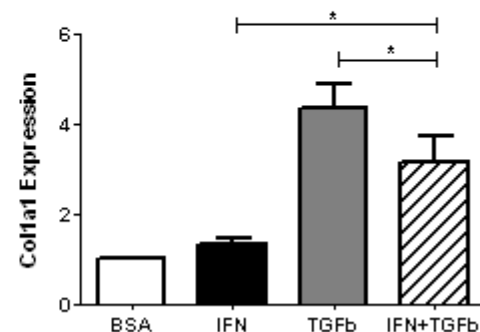

Supplement: MOESM4 [file 9693484]
